# Supplementary material for: Thrombospondin-1 Restricts Interleukin-36γ-Mediated Neutrophilic Inflammation during Pseudomonas aeruginosa Pulmonary Infection
Source: PubMed Central journal article supplement (PMC8092289; doi:10.1128/mbio.03336-20), 2021-04-06

**A** Bh-SNE analysis BALF 0h, 5h, 1dpi WT and Thbs1<sup>-/-</sup> mice

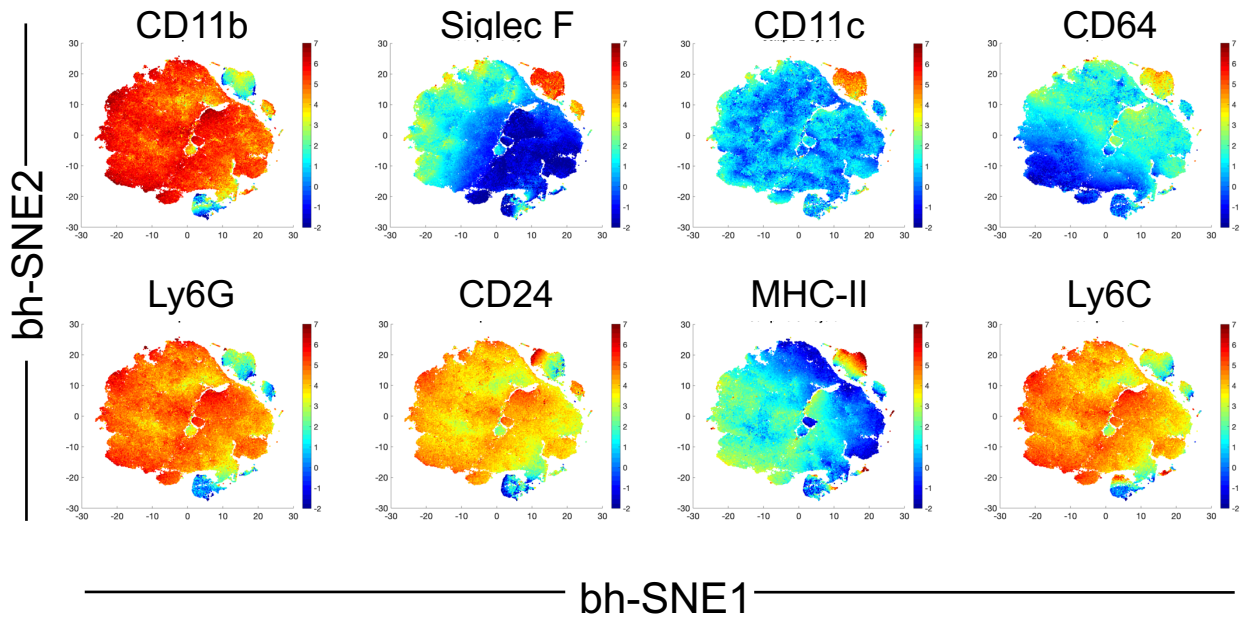

**B** Bh-SNE analysis BALF 1dpi WT and Thbs1<sup>-/-</sup> mice anti IL-36 $\gamma$

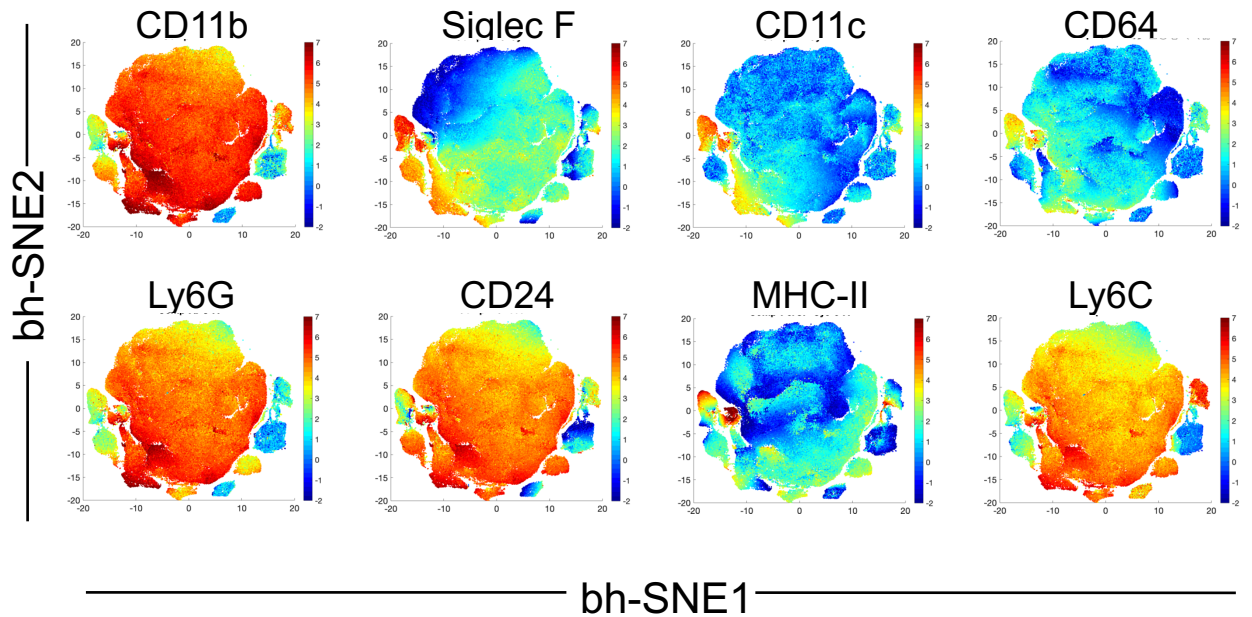

Supplement: mBio.03336-20-sf001.pdf [file mBio.03336-20-sf001.pdf]
