# Supplementary material for: Thrombospondin-1 Restricts Interleukin-36γ-Mediated Neutrophilic Inflammation during Pseudomonas aeruginosa Pulmonary Infection
Source: PubMed Central journal article supplement (PMC8092289; doi:10.1128/mbio.03336-20), 2021-04-06

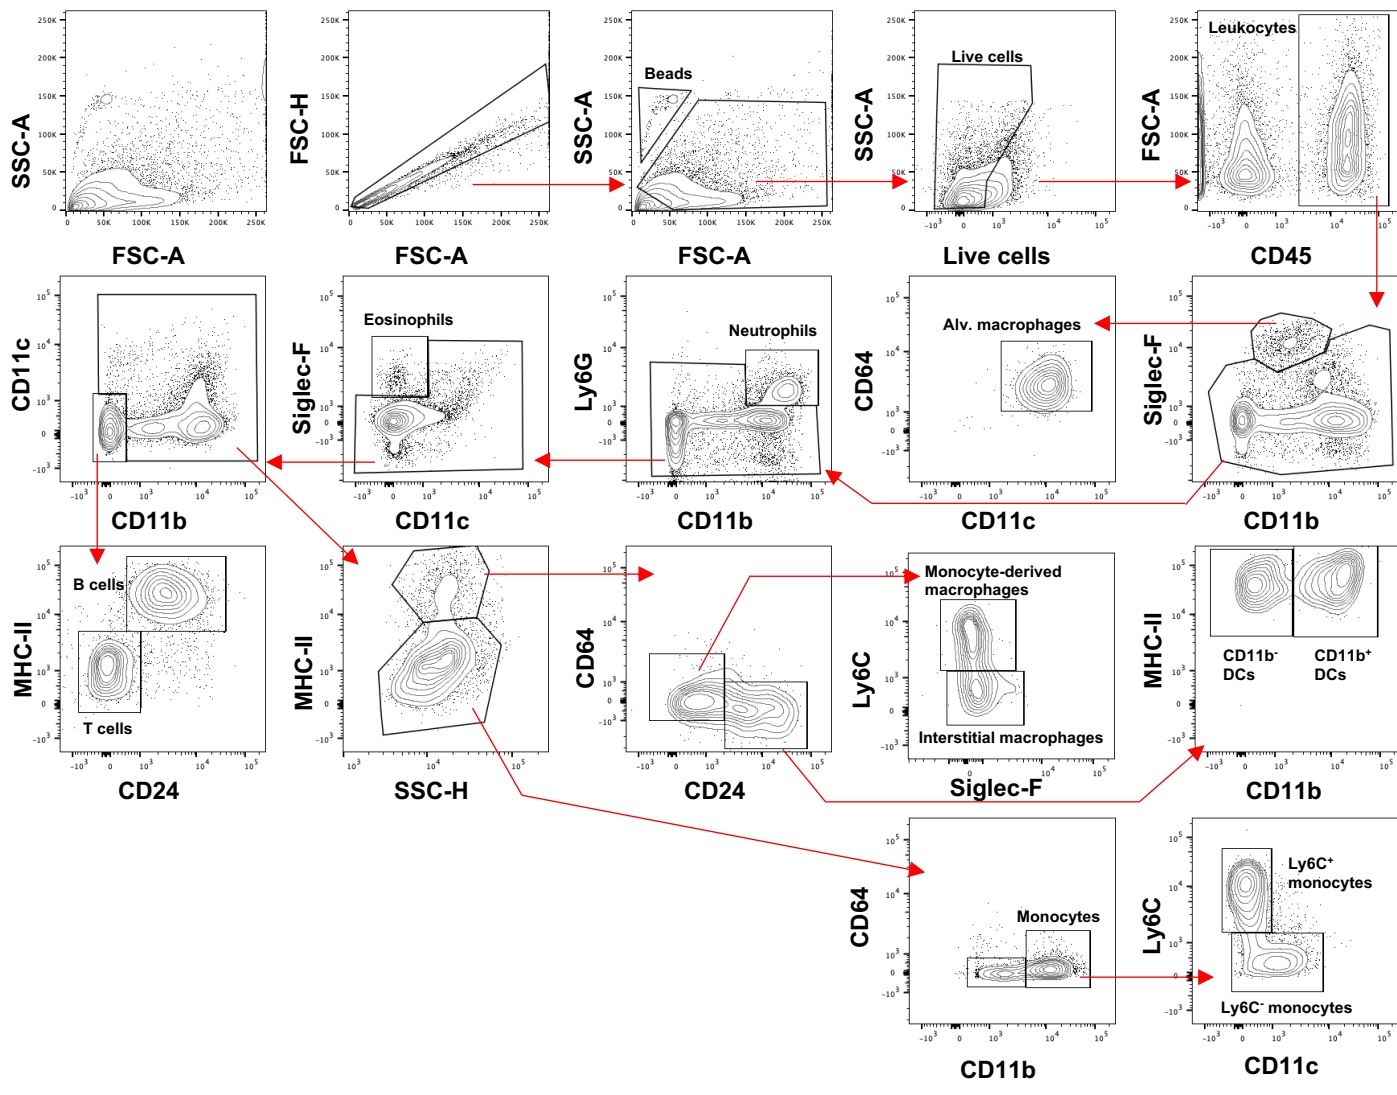

Supplement: mBio.03336-20-sf002.pdf [file mBio.03336-20-sf002.pdf]
