# Supplementary material for: Thrombospondin-1 Restricts Interleukin-36γ-Mediated Neutrophilic Inflammation during Pseudomonas aeruginosa Pulmonary Infection
Source: PubMed Central journal article supplement (PMC8092289; doi:10.1128/mbio.03336-20), 2021-04-06
Supplement: mBio.03336-20-st001.pdf [file mBio.03336-20-st001.pdf]

| Cell type                    | CD11b | CD11c | CD24 | CD64 | Ly6C | MHCII | SiglecF | Ly6G |
|------------------------------|-------|-------|------|------|------|-------|---------|------|
| Eosinophils                  | +     | -     | +    | -    | -    | -     | +       | -    |
| Neutrophils                  | +     | -     | +    | +/-  | +/-  | -     | -       | +    |
| Alv. Macrophages             | -     | +     | -    | +    | -    | +/-   | +       | -    |
| Ly6C+ monocytes              | +     | -     | -    | +/-  | +    | -     | -       | -    |
| Ly6C- monocytes              | +     | +/-   | -    | +/-  | -    | -     | -       | -    |
| CD11b+ DCs                   | +     | +     | +    | -    | +/-  | +     | -       | -    |
| CD11b- DCs                   | -     | +     | +/-  | -    | +/-  | +/-   | -       | -    |
| T cells                      | -     | -     | -    | -    | -    | -     | -       | -    |
| B cells                      | -     | -     | +    | -    | -    | +     | -       | -    |
| Monocyte-derived macrophages | +/-   | -     | -    | -    | +    | -     | -       | -    |

“+”: Positive; “-”: Negative; “+/-”: Medium expression.
